# Supplementary material
Source: Springer Nature journal article supplement (https://www.springermedizin.de/resource/supplementary/12885_2011_2931_MOESM4_ESM.pdf/9462274)

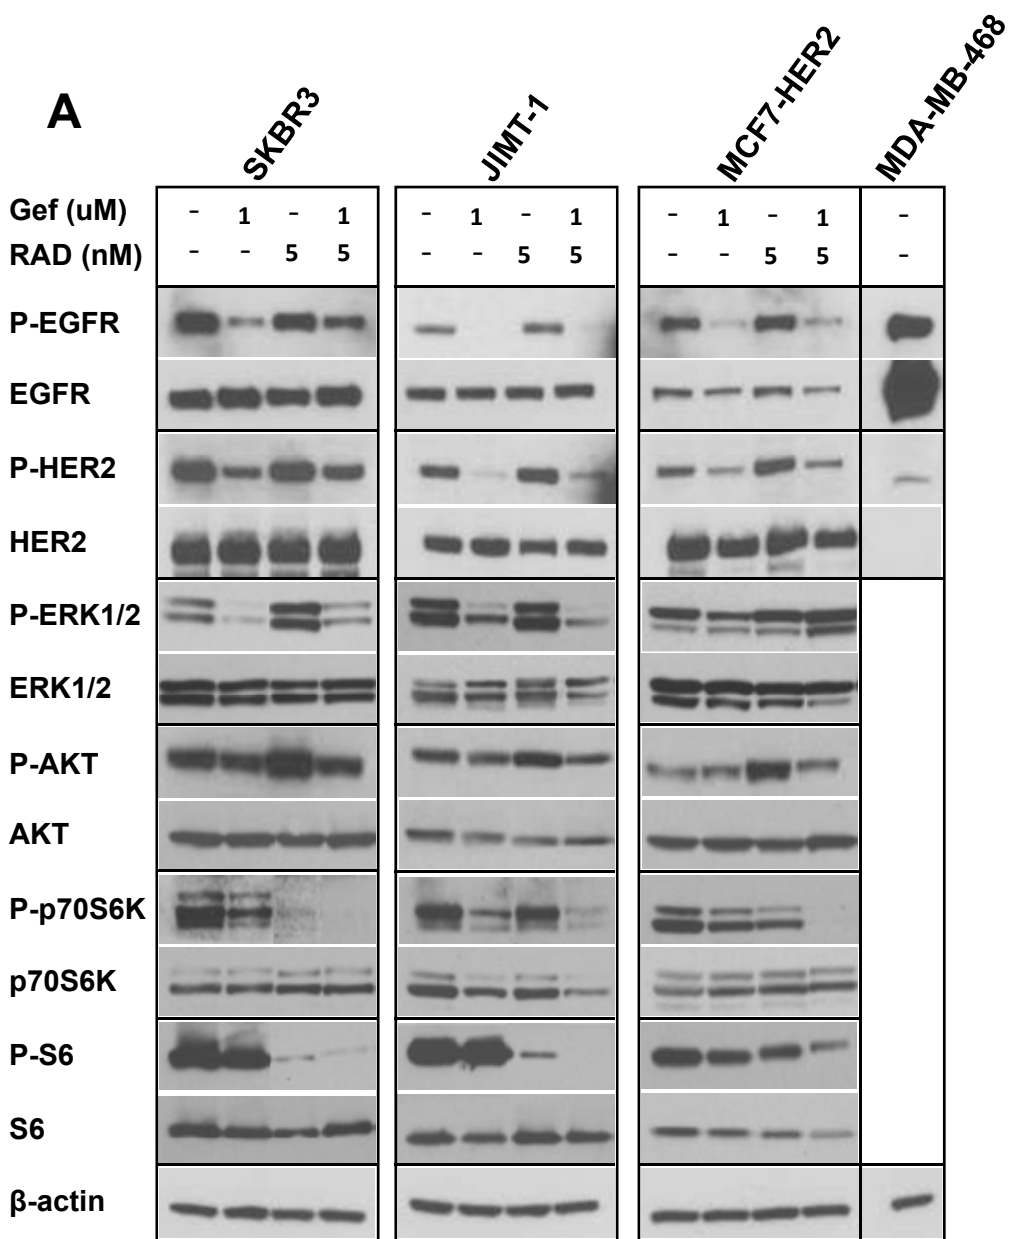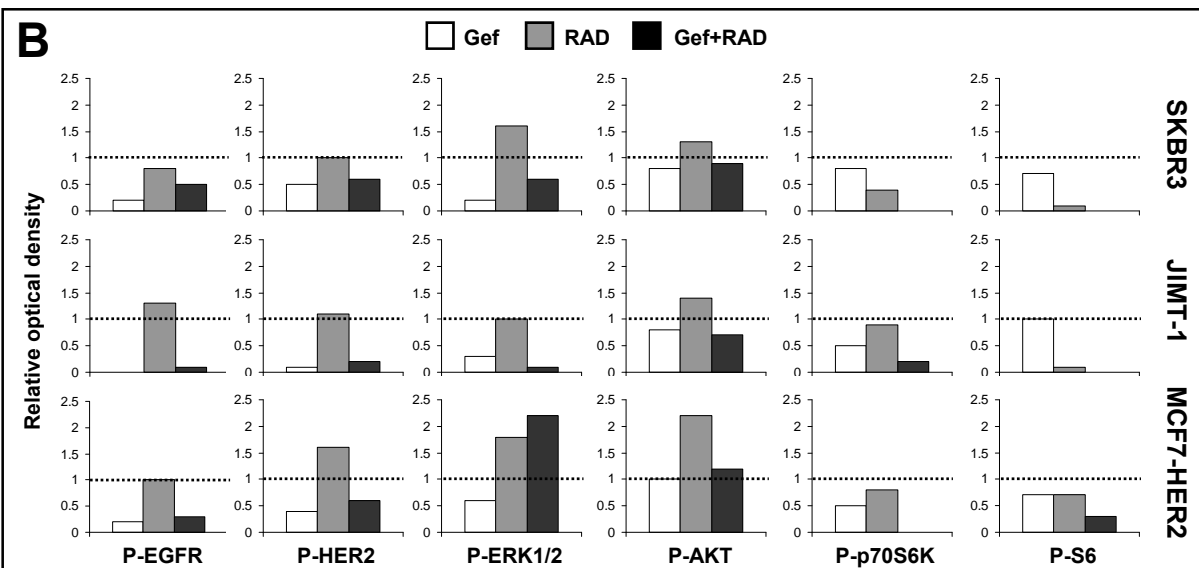

Supplement: MOESM4 [file 9462274]
